# Supplementary material for: The Specific Molecular Changes Induced by Diabetic Conditions in Valvular Endothelial Cells and upon Their Interactions with Monocytes Contribute to Endothelial Dysfunction
Source: MDPI journal article supplement (doi:10.3390/ijms25053048), 2024-03-06
Supplement: s1 [file s1]

Supplementary table S1: Data quality summary.

| sample                      | library          | raw_reads | raw_bases | clean_reads | clean_bases | error_rate | Q20   | Q30   | GC_pct |
|-----------------------------|------------------|-----------|-----------|-------------|-------------|------------|-------|-------|--------|
| VEC_C1 (NG)                 | ERRA220045756-1a | 41533514  | 6.23G     | 41349446    | 6.2G        | 0.03       | 97.31 | 92.51 | 49.68  |
| VEC_C2 (NG)                 | ERRA220045764-1a | 38059198  | 5.71G     | 37690706    | 5.65G       | 0.03       | 96.49 | 91.14 | 49.68  |
| VEC_C3 (NG)                 | ERRA220045772-1a | 43311384  | 6.5G      | 43076072    | 6.46G       | 0.03       | 96.97 | 91.77 | 49.89  |
| VEC_HG1 (HG)                | ERRA220045757-1a | 43582142  | 6.54G     | 43333020    | 6.5G        | 0.03       | 96.67 | 91.3  | 49.59  |
| VEC_HG2 (HG)                | ERRA220045765-1a | 45935402  | 6.89G     | 45697224    | 6.85G       | 0.03       | 97.47 | 92.83 | 49.84  |
| VEC_HG3 (HG)                | ERRA220045773-1a | 43745560  | 6.56G     | 43494268    | 6.52G       | 0.03       | 96.99 | 91.84 | 49.91  |
| VECi_C1 (NGi)               | ERRA220045758-1a | 52835880  | 7.93G     | 52546788    | 7.88G       | 0.03       | 97.34 | 92.62 | 50.08  |
| VECi_C2 (NGi)               | ERRA220045766-1a | 46017410  | 6.9G      | 45714780    | 6.86G       | 0.03       | 96.71 | 91.44 | 49.66  |
| VECi_C3 (NGi)               | ERRA220045774-1a | 42451408  | 6.37G     | 42237390    | 6.34G       | 0.03       | 97.13 | 92.13 | 49.92  |
| VECi_HG1 (HG <sub>i</sub> ) | ERRA220045759-1a | 51728474  | 7.76G     | 51395098    | 7.71G       | 0.03       | 97.52 | 93.05 | 49.9   |
| VECi_HG2 (HG <sub>i</sub> ) | ERRA220045767-1a | 40759850  | 6.11G     | 40514292    | 6.08G       | 0.03       | 96.46 | 90.87 | 49.64  |
| VECi_HG3 (HG <sub>i</sub> ) | ERRA220045775-1a | 46606566  | 6.99G     | 46340662    | 6.95G       | 0.03       | 97.49 | 92.94 | 49.97  |

Supplementary table S2: Mapping result summary.

| sample      | total_reads | total_map        | Unique_map       | multi_map      | read1_map        | read2_map        | positive_map     | negative_map     | splice_map       | unsplice_map     | proper_map       |
|-------------|-------------|------------------|------------------|----------------|------------------|------------------|------------------|------------------|------------------|------------------|------------------|
| VEC_C1 (NG) | 41349446    | 39806907(96.27%) | 38864378(93.99%) | 942529(2.28%)  | 19492048(47.14%) | 19372330(46.85%) | 19422461(46.97%) | 19441917(47.02%) | 15926854(38.52%) | 22937524(55.47%) | 37965936(91.82%) |
| VEC_C2 (NG) | 37690706    | 36113871(95.82%) | 35325563(93.72%) | 788308(2.09%)  | 17705132(46.97%) | 17620431(46.75%) | 17645969(46.82%) | 17679594(46.91%) | 14390482(38.18%) | 20935081(55.54%) | 34397978(91.26%) |
| VEC_C3 (NG) | 43076072    | 41024669(95.24%) | 39994024(92.85%) | 1030645(2.39%) | 20029286(46.5%)  | 19964738(46.35%) | 19981640(46.39%) | 20012384(46.46%) | 16295286(37.83%) | 23698738(55.02%) | 38901474(90.31%) |

|                               |                  |                          |                          |                        |                          |                          |                          |                          |                          |                          |                          |
|-------------------------------|------------------|--------------------------|--------------------------|------------------------|--------------------------|--------------------------|--------------------------|--------------------------|--------------------------|--------------------------|--------------------------|
| VEC<br>_HG<br>1<br>(HG<br>)   | 433<br>330<br>20 | 413215<br>53(95.3<br>6%) | 403447<br>85(93.1<br>%)  | 97676<br>8(2.25<br>%)  | 202495<br>12(46.7<br>3%) | 200952<br>73(46.3<br>7%) | 201567<br>43(46.5<br>2%) | 201880<br>42(46.5<br>9%) | 161988<br>66(37.3<br>8%) | 241459<br>19(55.7<br>2%) | 392621<br>78(90.6<br>1%) |
| VEC<br>_HG<br>2<br>(HG<br>)   | 456<br>972<br>24 | 437641<br>45(95.7<br>7%) | 426655<br>13(93.3<br>7%) | 10986<br>32(2.4<br>%)  | 213880<br>52(46.8<br>%)  | 212774<br>61(46.5<br>6%) | 213213<br>21(46.6<br>6%) | 213441<br>92(46.7<br>1%) | 171087<br>27(37.4<br>4%) | 255567<br>86(55.9<br>3%) | 417269<br>18(91.3<br>1%) |
| VEC<br>_HG<br>3<br>(HG<br>)   | 434<br>942<br>68 | 415481<br>39(95.5<br>3%) | 405277<br>57(93.1<br>8%) | 10203<br>82(2.3<br>5%) | 203022<br>90(46.6<br>8%) | 202254<br>67(46.5<br>%)  | 202456<br>10(46.5<br>5%) | 202821<br>47(46.6<br>3%) | 163188<br>64(37.5<br>2%) | 242088<br>93(55.6<br>6%) | 394609<br>48(90.7<br>3%) |
| VEC<br>i_C1<br>(NG<br>i)      | 525<br>467<br>88 | 501061<br>66(95.3<br>6%) | 487846<br>86(92.8<br>4%) | 13214<br>80(2.5<br>1%) | 244536<br>72(46.5<br>4%) | 243310<br>14(46.3<br>%)  | 243796<br>58(46.4<br>%)  | 244050<br>28(46.4<br>4%) | 200328<br>67(38.1<br>2%) | 287518<br>19(54.7<br>2%) | 476509<br>26(90.6<br>8%) |
| VEC<br>i_C2<br>(NG<br>i)      | 457<br>147<br>80 | 436043<br>19(95.3<br>8%) | 425289<br>73(93.0<br>3%) | 10753<br>46(2.3<br>5%) | 213187<br>88(46.6<br>3%) | 212101<br>85(46.4<br>%)  | 212424<br>52(46.4<br>7%) | 212865<br>21(46.5<br>6%) | 171274<br>41(37.4<br>7%) | 254015<br>32(55.5<br>7%) | 414156<br>70(90.6<br>%)  |
| VEC<br>i_C3<br>(NG<br>i)      | 422<br>373<br>90 | 403357<br>00(95.5<br>%)  | 393276<br>15(93.1<br>1%) | 10080<br>85(2.3<br>9%) | 196879<br>12(46.6<br>1%) | 196397<br>03(46.5<br>%)  | 196497<br>79(46.5<br>2%) | 196778<br>36(46.5<br>9%) | 160039<br>26(37.8<br>9%) | 233236<br>89(55.2<br>2%) | 382799<br>38(90.6<br>3%) |
| VEC<br>i_H<br>G1<br>(HG<br>i) | 513<br>950<br>98 | 494185<br>93(96.1<br>5%) | 481939<br>84(93.7<br>7%) | 12246<br>09(2.3<br>8%) | 241362<br>79(46.9<br>6%) | 240577<br>05(46.8<br>1%) | 240816<br>87(46.8<br>6%) | 241122<br>97(46.9<br>2%) | 196193<br>75(38.1<br>7%) | 285746<br>09(55.6<br>%)  | 470864<br>76(91.6<br>2%) |
| VEC<br>i_H<br>G2<br>(HG<br>i) | 405<br>142<br>92 | 386165<br>87(95.3<br>2%) | 376799<br>78(93.0<br>%)  | 93660<br>9(2.31<br>%)  | 189354<br>89(46.7<br>4%) | 187444<br>89(46.2<br>7%) | 188220<br>67(46.4<br>6%) | 188579<br>11(46.5<br>5%) | 152378<br>46(37.6<br>1%) | 224421<br>32(55.3<br>9%) | 366450<br>82(90.4<br>5%) |
| VEC<br>i_H<br>G3<br>(HG<br>i) | 463<br>406<br>62 | 445656<br>43(96.1<br>7%) | 434496<br>66(93.7<br>6%) | 11159<br>77(2.4<br>1%) | 217722<br>66(46.9<br>8%) | 216774<br>00(46.7<br>8%) | 217071<br>21(46.8<br>4%) | 217425<br>45(46.9<br>2%) | 175187<br>91(37.8<br>%)  | 259308<br>75(55.9<br>6%) | 424562<br>64(91.6<br>2%) |

**Supplementary Table S3. The sequences of oligonucleotide primers used for evaluation of gene expression.**

| <b>Gene</b> | <b>Forward primer</b>   | <b>Reverse primer</b>   |
|-------------|-------------------------|-------------------------|
| VASP        | ATGGCAACAAGCGATGGCT     | CGATGGCACAGTTGATGACCA   |
| ROCK1       | GGTGGTCGGTTGGGGTATTTT   | CGCCCTAACCTCACTTCCC     |
| RhoA        | GGAAAGCAGGTAGAGTTGGCT   | GGCTGTCGATGGAAAAACACAT  |
| ITGA1       | GTGCTTATTGGTTCTCCGTTAGT | CACAAGCCAGAAATCCTCCAT   |
| ITGA3       | TGTGGCTTGGAGTGACTGTG    | TCATTGCCTCGCACGTAGC     |
| ITGA4       | TACAGATGCAGGATCGGAAAGA  | AGGTTCTCCATTAGGGCTACC   |
| ITGA5       | GCCTGTGGAGTACAAGTCCTT   | AATTCGGGTGAAGTTATCTGTGG |
| ITGAV       | GCTGTCGGAGATTTCAATGGT   | TCTGCTCGCCAGTAAAATTGT   |
| ITGB1       | GTAACCAACCGTAGCAAAGGA   | TCCCCTGATCTTAATCGCAAAAC |
| ITGB2       | TTCGGGTCCTTCGTGGACA     | ACTGGTTGGAGTTGTTGGTCA   |
| ITGB3       | CATGAAGGATGATCTGTGGAGC  | AATCCGCAGGTTACTGGTGAG   |
| ITGB5       | GGAAGTTCGGAAACAGAGGGT   | CTTTCGCCAGCCAATCTTCTC   |
| FAK         | AGTGGACCAGGAAATTGCTTTG  | GTGTTTTGGCCTTGACAGAATC  |
| CAV1        | CATCCCGATGGCACTCATCTG   | TGCACTGAATCTCAATCAGGAAG |
| JAM2        | AACTGGGTCGGAGTGTCTC     | GGGGCACTAACTTCACAACGA   |
| CLDN5       | CTCTGCTGGTTCGCCAACAT    | CAGCTCGTACTTCTGCGACA    |
| CDH2        | TGCGGTACAGTGTAAGTGGG    | GAAACCGGGCTATCTGCTCG    |
| CDH5        | TTGGAACCAGATGCACATTGAT  | TCTTGCGACTCACGCTTGAC    |
| CDH11       | CCATCCCAAGAGAGGTCTGC    | TAGGCACAGAATGCAGC       |
| ICAM1       | TTGGGCATAGAGACCCCGTT    | GCACATTGCTCAGTTCATACACC |
| VCAM1       | TTGGGCATAGAGACCCCGTT    | GCACATTGCTCAGTTCATACACC |
| PECAM1      | CCAAGGTGGGATCGTGAGG     | TCGGAAGGATAAAACGCGGTC   |
| SELE        | GGGAAGATGGTCGTGATCCTT   | TCTGGGGTGGTCTCGATTTTA   |
| VWF         | CCTTGACCTCGGACCCTTATG   | GATGCCCCGTTACACCACT     |

A

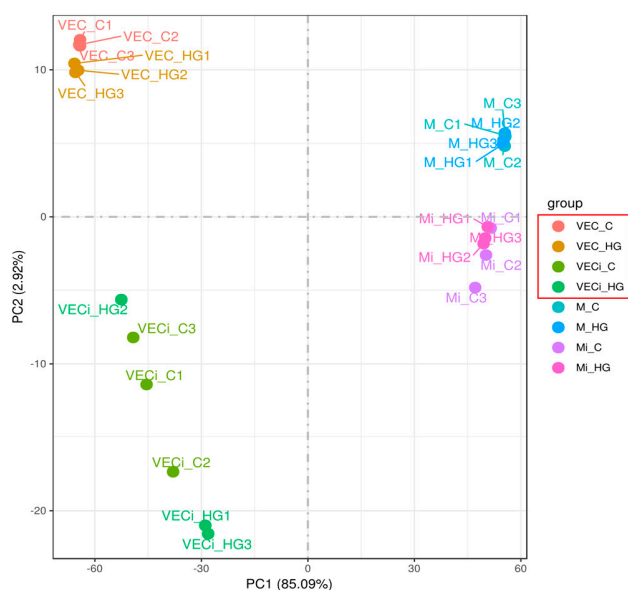

B

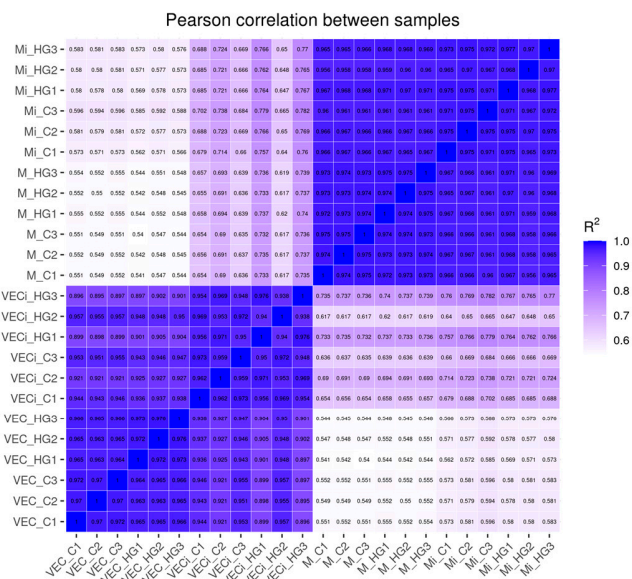

**Supplementary Figure S1: PCA and Pearson correlation coefficient matrix.** The Pearson correlation matrix show a high correlation between replicates. VEC\_C represents VECs in normal glucose (NG), VEC\_HG represents VECs in high glucose (HG), VEC\_Ci represents VECs interacted with monocytes in normal glucose (NGi) and VECi\_HG represents VECs interacted with monocytes in high glucose (HG).

**A**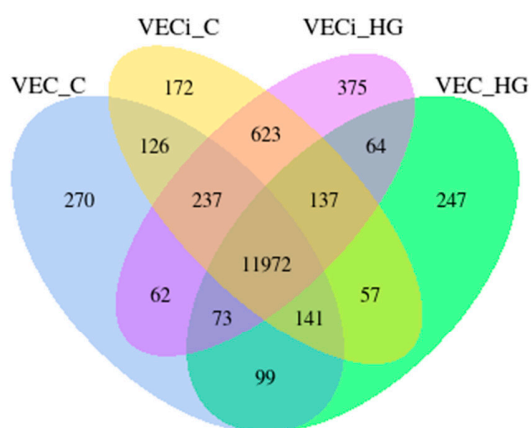**B**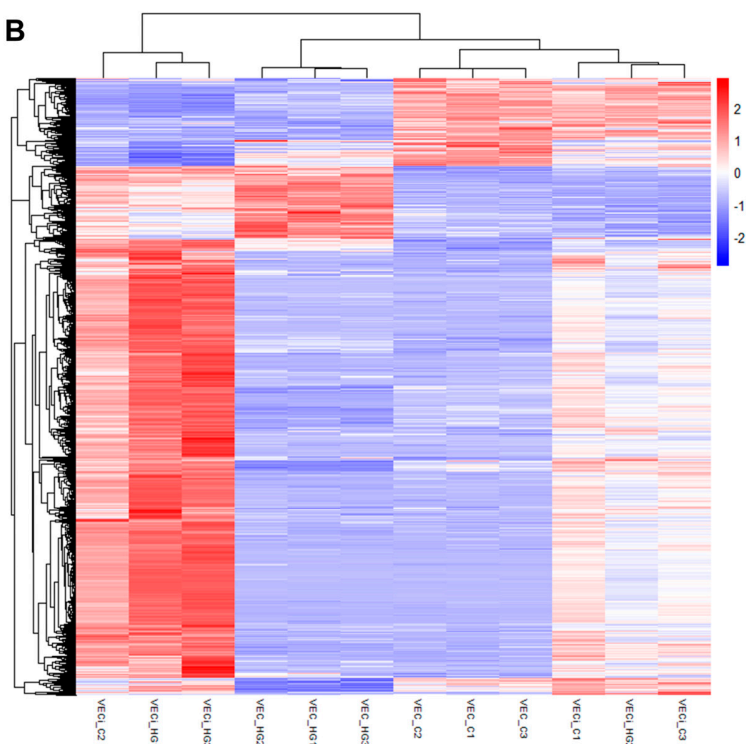

**Supplementary Figure S2:** VENN diagram of all samples. Heatmap of all genes with fold change  $>1.5$  and  $\text{padj} < 0.05$ . VEC\_C represents VECs in normal glucose (NG), VEC\_HG represents VECs in high glucose (HG), VEC\_Ci represents VECs interacted with monocytes in normal glucose (NGi) and VECi\_HG represents VECs interacted with monocytes in high glucose (HG<sub>i</sub>).

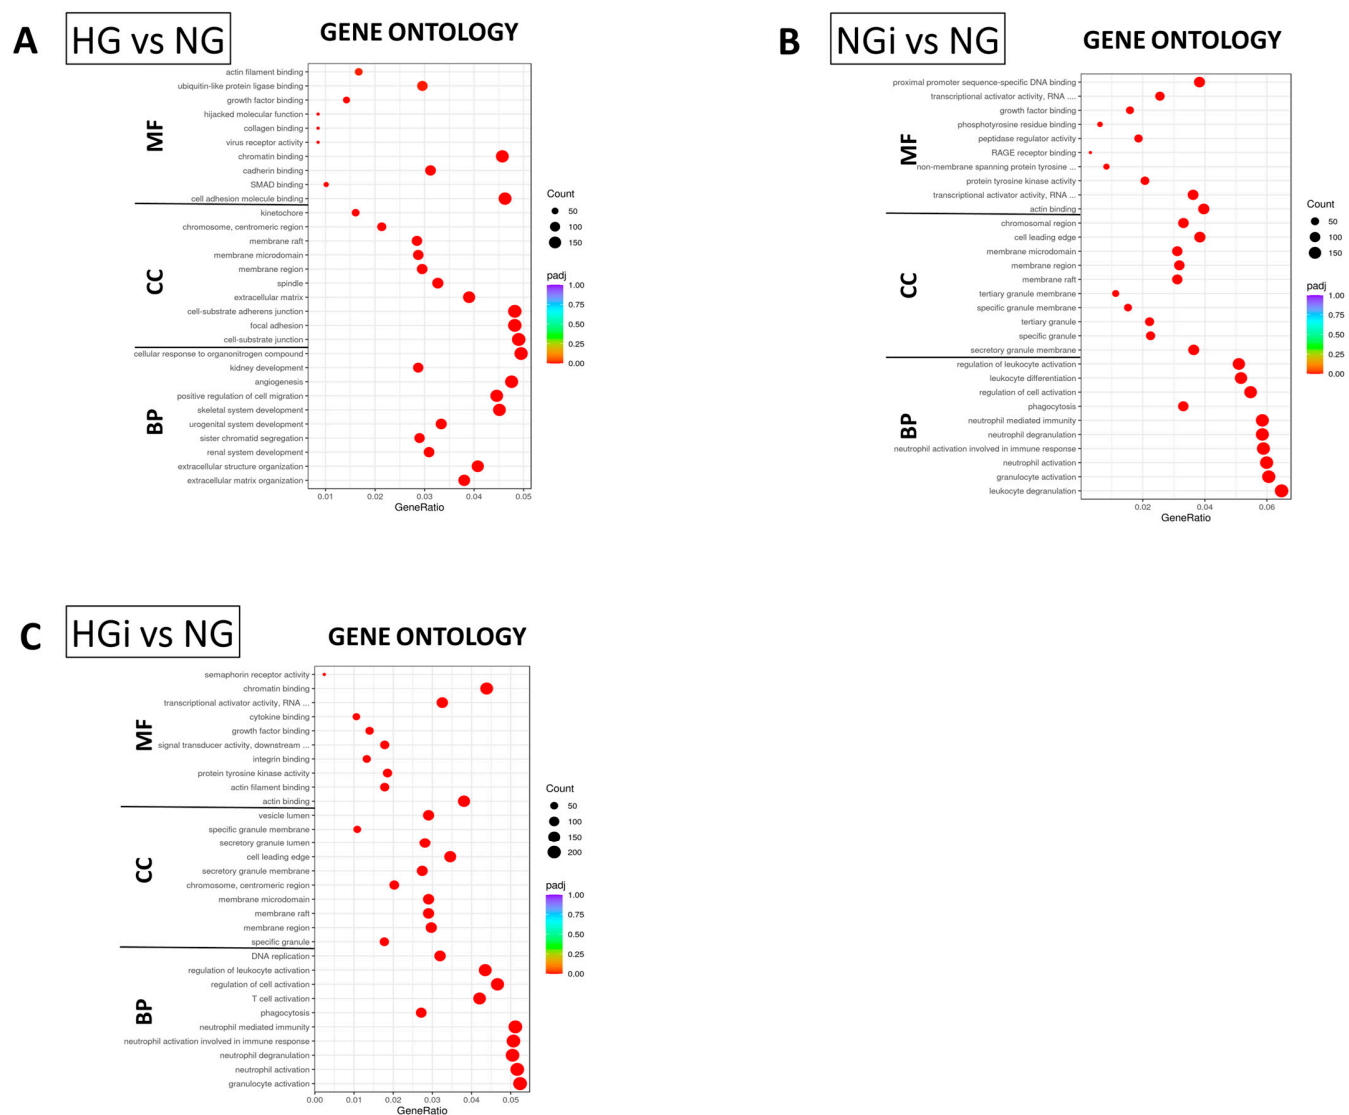

**Supplementary Figure S3.** Gene ontology analysis of DEGs in HG, NGi and HGi compared to NG. The top 10 enrichments in Molecular function (MF), Cellular compartment (CC) and Biological process (BP) are depicted for each comparison.
